# Supplementary material
Source: publisher site journal article supplement (https://www.dovepress.com/article/578393)
Supplement: Supplementary file 1 [file 578393%20Supplementary%20Tables.docx]

Supplemental Table 1: IOL Models Available on the Zeiss AI IOL Calculator

| Manufacturer (Location) | IOL Model |
| --- | --- |
| Alcon Laboratories (Geneva Switzerland) | AcrySofAU00T0 |
| AcrySofSA60AT |
| AcrySofSA60WF |
| AcrySofSN60WF |
| ClareonCNA0T0 |
| ClareonSY60WF |
| Bausch & Lomb  (Bridgewater, NJ) | enVistaenhanced (MX60E) |
| SofPortAO |
| Carl Zeiss Meditec (Jena, Germany) | CT LUCIA 621P |
| Johnson and Johnson Vision (Jacksonville, FL) | DCB00 |
| ZCB00 |
| PCB00 |
| DIB00 |

Supplemental Table 2: Relative Formula Performance for Unoptimized Spherical Equivalent Prediction Errors

|  | ZAIC | BU2 K | Kane K | BU2 TK | Kane TK |
| --- | --- | --- | --- | --- | --- |
| MPE, D | 0.099 | 0.074a | 0.010a | 0.140a | 0.076a |
| SD, D | 0.381 | 0.411a | 0.385 | 0.417a | 0.393 |
| MAE, D | 0.311 | 0.324 | 0.298 | 0.339a | 0.312 |
| MedAE, D | 0.271 | 0.255 | 0.240 | 0.280 | 0.245 |
| RMSAE, D | 0.392 | 0.417 | 0.384 | 0.439a | 0.400 |
| % ≤ 0.25 D | 116 (47%) | 122 (50%) | 130 (53%) | 110 (45%) | 126 (51%) |
| % ≤ 0.50 D | 197 (80%) | 192 (78%) | 201 (82%) | 191 (78%) | 196 (80%) |
| % ≤ 0.75 D | 231 (94%) | 231 (94%) | 231 (94%) | 224 (91%) | 229 (93%) |
| % ≤ 1.00 D | 243 (99%) | 241 (98%) | 241 (98%) | 240 (98%) | 242 (98%) |

aZAIC performed significantly (p < 0.05) better than the corresponding formula. BU2, Barrett Universal II; K, standard keratometry; MAE, mean absolute error; MedAE, median absolute error; MPE, mean prediction error; RMSAE, root mean squared absolute error; SD, standard deviation of the MPE; TK, total keratometry; ZAIC, Zeiss AI IOL Calculator.
